# Supplementary material
Source: PubMed Central journal article supplement (PMC2653568)

**Appendix 1:** Observed versus hypothetical median survival among patients after each admission to hospital because of heart failure. Hypothetical survival assumes that all out-of-hospital cardiac deaths were preventable with the use of an implantable cardioverter defibrillator. Error bars = 95% confidence intervals.

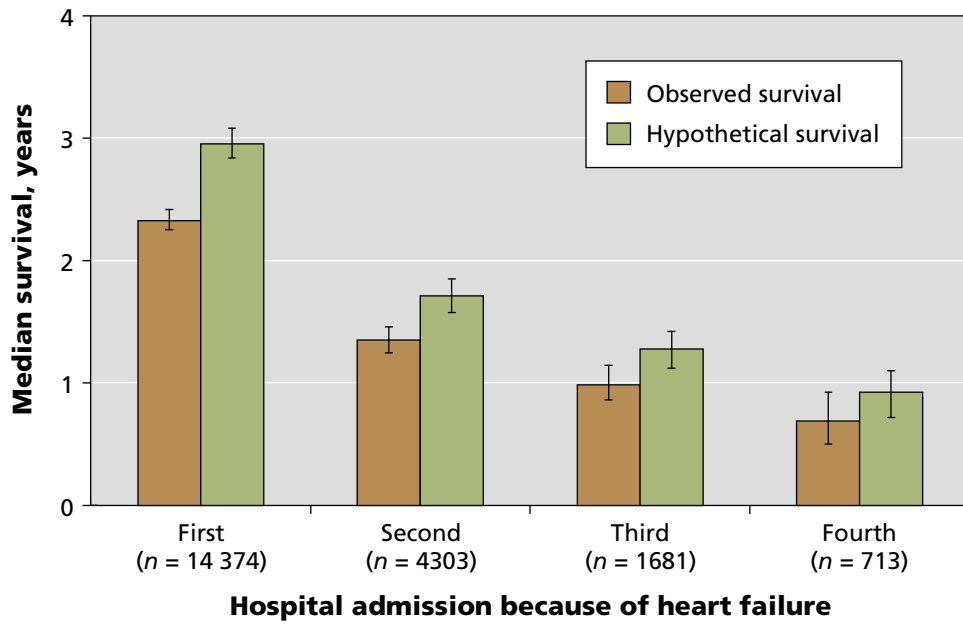

Supplement: supp_180_6_611_v2_1.pdf [file supp_180_6_611_v2_1.pdf]
